# Supplementary material for: Characterising the speech phenotype in individuals with craniofacial microsomia: a scoping review protocol
Source: HighWire-hosted journal article supplement (doi:10.1136/bmjopen-2022-069233), 2023-02-01
Supplement: bmjopen-2022-069233supp001_data_supplement.pdf [file bmjopen-2022-069233supp001_data_supplement.pdf]

**Supplementary Table 1: Ovid MEDLINE search strategy.\***

| # | Ovid Medline and Epub Ahead of Print, In-Process, In-Data-Review & Other Non-Indexed Citations, 1946 to Current                                                                                                                                                                                                                                                                                                                                                                                                                                                                                                                                                                                                                                                                                                                                                                                                                                                                                                            |
|---|----------------------------------------------------------------------------------------------------------------------------------------------------------------------------------------------------------------------------------------------------------------------------------------------------------------------------------------------------------------------------------------------------------------------------------------------------------------------------------------------------------------------------------------------------------------------------------------------------------------------------------------------------------------------------------------------------------------------------------------------------------------------------------------------------------------------------------------------------------------------------------------------------------------------------------------------------------------------------------------------------------------------------|
| 1 | Facial Asymmetry/ or Goldenhar Syndrome/ or (goldenhar* or otomandibular dysostosis* or otomandibular syndrome* or ((branchial* or first or pharyngeal*) adj3 arch syndrome*) or ((crani* or face? or facies or facial* or orbitocranial*) adj3 asymmetr*) or ((craniofacial* or hemifacial*) adj3 microsomia*) or ((facioauriculovertebral or facio auricul* or lateral facial or moeschler clarren* or oculoauricul* or oculo auricul* or oral mandibular auricular) adj3 (disease* or dysplasia* or sequeunce* or spectrum* or syndrome*)) or (unilateral* adj3 hypoplas*).tw,kf.                                                                                                                                                                                                                                                                                                                                                                                                                                       |
| 2 | exp Central Nervous System/ab or (anarthri* or aphony* or apractic* or apraxi* or articul* or cluttering* or communicat* or disarthric* or disarticulat* or dysarthos* or dysarthr* or dysfluen* or dysphoni* or dysglossia* or dyslali* or dyspraxi* or fluen* or hemiparaly* or hemipegi* or hoarseness* or hypernasal* or hyperphoni* or hyperrhinolali* or hyponasal* or hypophoni* or leptophoni* or logopath* or logopedi* or microphoni* or misarticulat* or mute* or mutism* or neurodevelop* or neurolog* or oral* or pals* or paralali* or paraly* or pareses or paresis or paretic* or phonat* or pronounc* or (resonance* not magnetic resonance*) or rhinism* or rhinolali* or rhinophoni* or speech* or stammer* or stutter* or trachyphoni* or verbal* or vocal* or voice* or ((absen* or los#) adj3 voice) or (central nervous system* adj3 (abnormal* or anomal* or defect* or deficien* or disease* or disorder* or dysfunct* or fail* or inadequa* or incompeten* or insufficien* or malform*))).jw,mp. |
| 3 | Velopharyngeal Insufficiency/ or ((palata or palatal* or palate* or palatine* or palatonasal* or palatopharyn* or palatum or pharyn* or velopalat* or velopharyn*) adj3 (abnormal* or anomal* or defect* or deficien* or disease* or disorder* or dysfunct* or fail* or inadequa* or incompeten* or insufficien* or malform*)).tw,kf.                                                                                                                                                                                                                                                                                                                                                                                                                                                                                                                                                                                                                                                                                      |
| 4 | Congenital Microtia/ or (anotia* or microtia* or small ear? or ((auricul* or ear? or mandibul*) adj3 (aplasia* or hypoplas*))).tw,kf.                                                                                                                                                                                                                                                                                                                                                                                                                                                                                                                                                                                                                                                                                                                                                                                                                                                                                      |
| 5 | ((aural* or auricul* or ear*) adj3 atresi*).tw,kf.                                                                                                                                                                                                                                                                                                                                                                                                                                                                                                                                                                                                                                                                                                                                                                                                                                                                                                                                                                         |
| 6 | exp Infant/ or exp Child/ or Child, Hospitalized/ or Adolescent/ or Adolescent, Hospitalized/ or Young Adult/ or (pediatric* or paediatric* or child* or newborn* or neonat* or baby or babies or infan* or preschool* or toddler* or kindergarten* or ((nursery or primary or elementary or middle or high or age*1) adj school*) or teen* or preteen* or preadolescen* or adolescen* or youth* or youngster* or boy* or girl* or juvenile* or young adult* or college*).tw,kf,so,jw.                                                                                                                                                                                                                                                                                                                                                                                                                                                                                                                                     |
| 7 | 1 and (2 or 3) and 6                                                                                                                                                                                                                                                                                                                                                                                                                                                                                                                                                                                                                                                                                                                                                                                                                                                                                                                                                                                                       |
| 8 | 2 and (4 or 5) and 6                                                                                                                                                                                                                                                                                                                                                                                                                                                                                                                                                                                                                                                                                                                                                                                                                                                                                                                                                                                                       |
| 9 | (7 or 8) and english.la.                                                                                                                                                                                                                                                                                                                                                                                                                                                                                                                                                                                                                                                                                                                                                                                                                                                                                                                                                                                                   |

\* Field codes: jw = journal word; kf = keyword heading word; la = language; mp = title, abstract, original title, name of substance word, subject heading word, floating sub-heading word, keyword heading word, organism supplementary concept word, protocol supplementary concept word, rare disease supplementary concept word, unique identifier, synonyms; so = source; tw = text word (title or abstract)
